# Supplementary material for: Evaluation of Matrix Metalloproteinase 9 Serum Concentration as a Biomarker in Malignant Mesothelioma
Source: Hindawi journal article supplement (doi:10.1155/2019/1242964), 2019-05-02
Supplement: f1 [file 1242964.f1.pdf]

Supplementary table 1: Association of *MMP9* haplotypes with serum MMP9 levels before treatment.

| Haplotype | Estimated frequency | Estimated mean MMP9 (ng/ml) (95% CI) | Difference compared to reference haplotype (95% CI) | P     |
|-----------|---------------------|--------------------------------------|-----------------------------------------------------|-------|
| ACGT      | 0.59                | 382.8 (312.6-453.1)                  | Reference                                           |       |
| GCGC      | 0.19                | 527.0 (386.5-667.5)                  | 144.2 (-29.7-318.0)                                 | 0.104 |
| GCAC      | 0.14                | 593.2 (388.9-797.6)                  | 210.4 (-17.8-438.6)                                 | 0.071 |
| ACGC      | 0.04                | 451.8 (-71.2-974.8)                  | 69.0 (-459.4-597.3)                                 | 0.798 |
| AGAC      | 0.03                | 358.1 (-689.5-1405.6)                | -24.8 (-1071.3-1021.7)                              | 0.963 |
| AGGC      | 0.02                | 27.6 (-4450.2-4505.5)                | -355.2 (-4835.7-4125.3)                             | 0.877 |

The SNPs are ordered from the 5' - to 3'-end as follows: rs17576, rs2250889, rs17577, and rs20544
